# Supplementary material
Source: Springer Nature journal article supplement (https://www.springermedizin.de/resource/supplementary/12943_2005_141_MOESM4_ESM.pdf/9553684)

**A**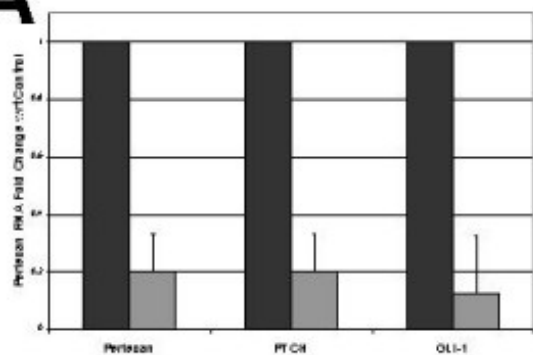**B**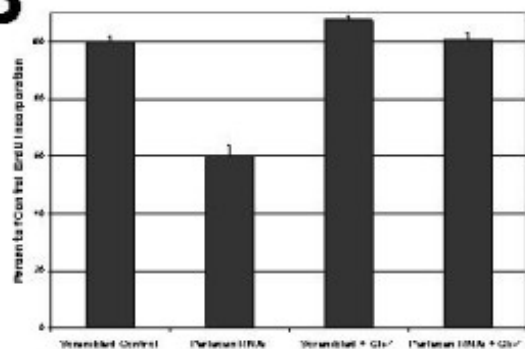**C**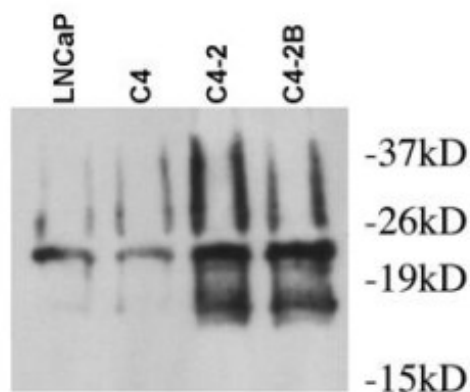**D**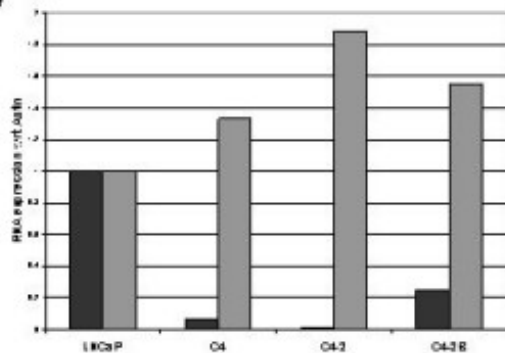

Supplement: MOESM4 [file 9553684]
